# Supplementary material for: Evaluation of low-cost gas sensors to quantify intra-urban variability of atmospheric pollutants
Source: Royal Society of Chemistry journal article supplement (doi:10.1039/d2ea00165a), 2023-01-01
Supplement: d2ea00165a1.pdf [file d2ea00165a1.pdf]

Supplementary Information

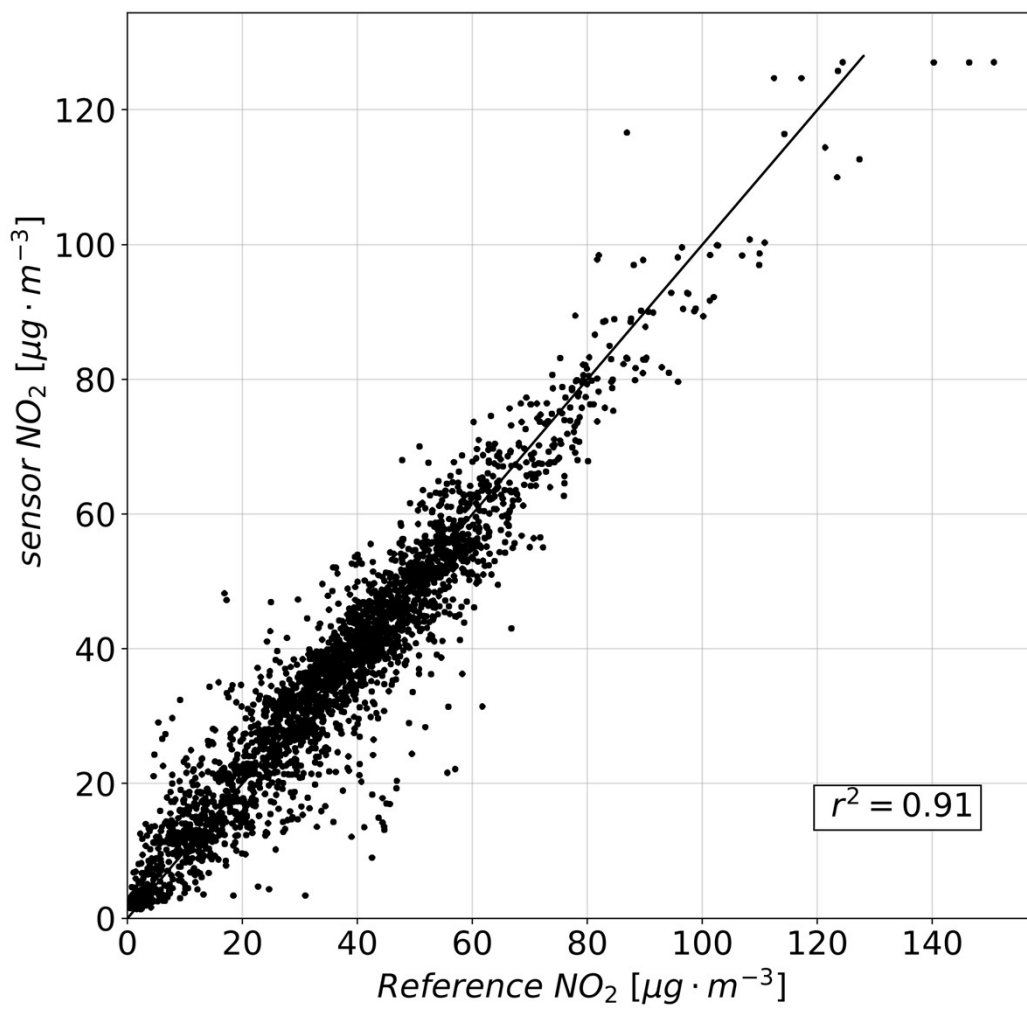

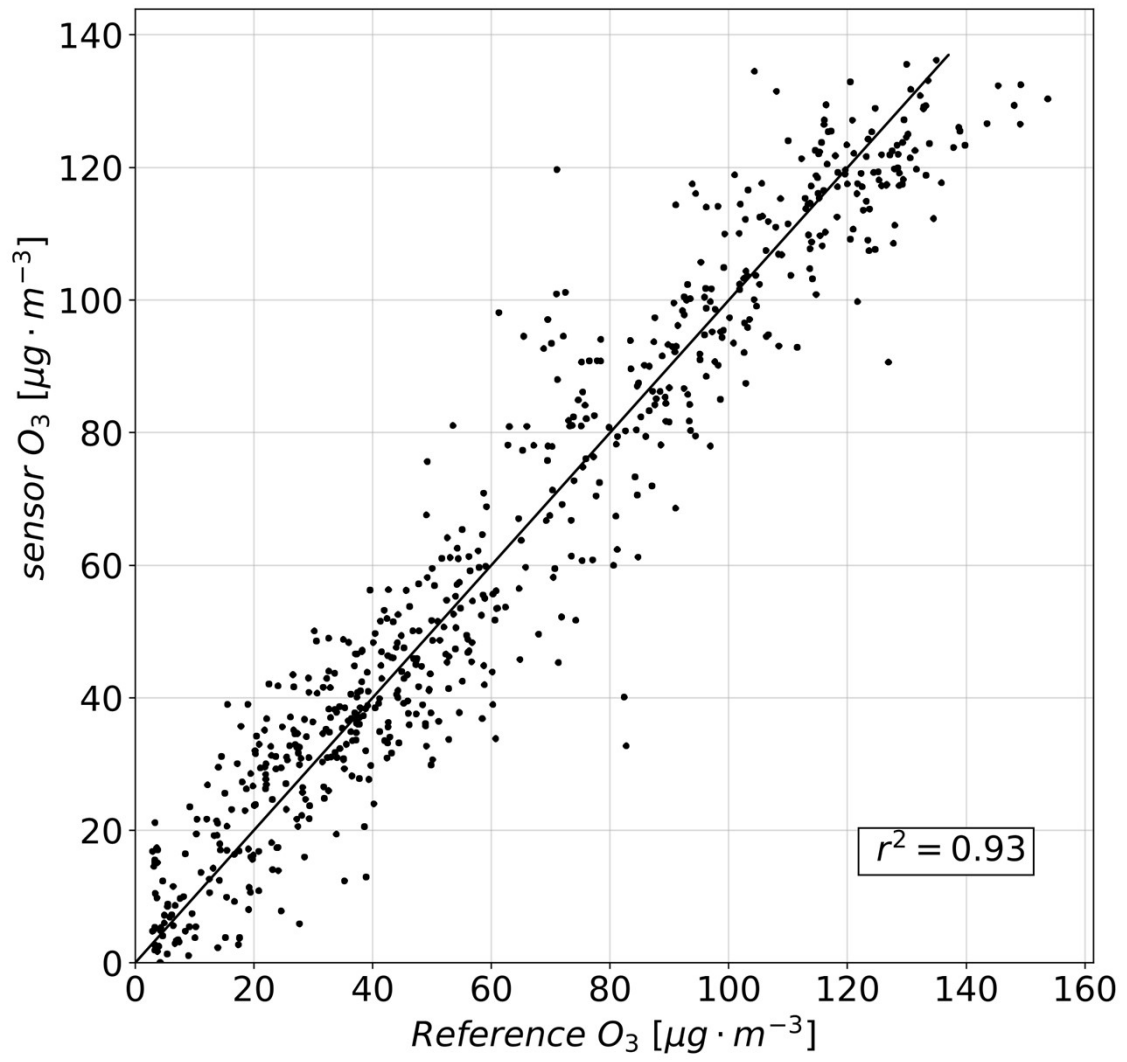

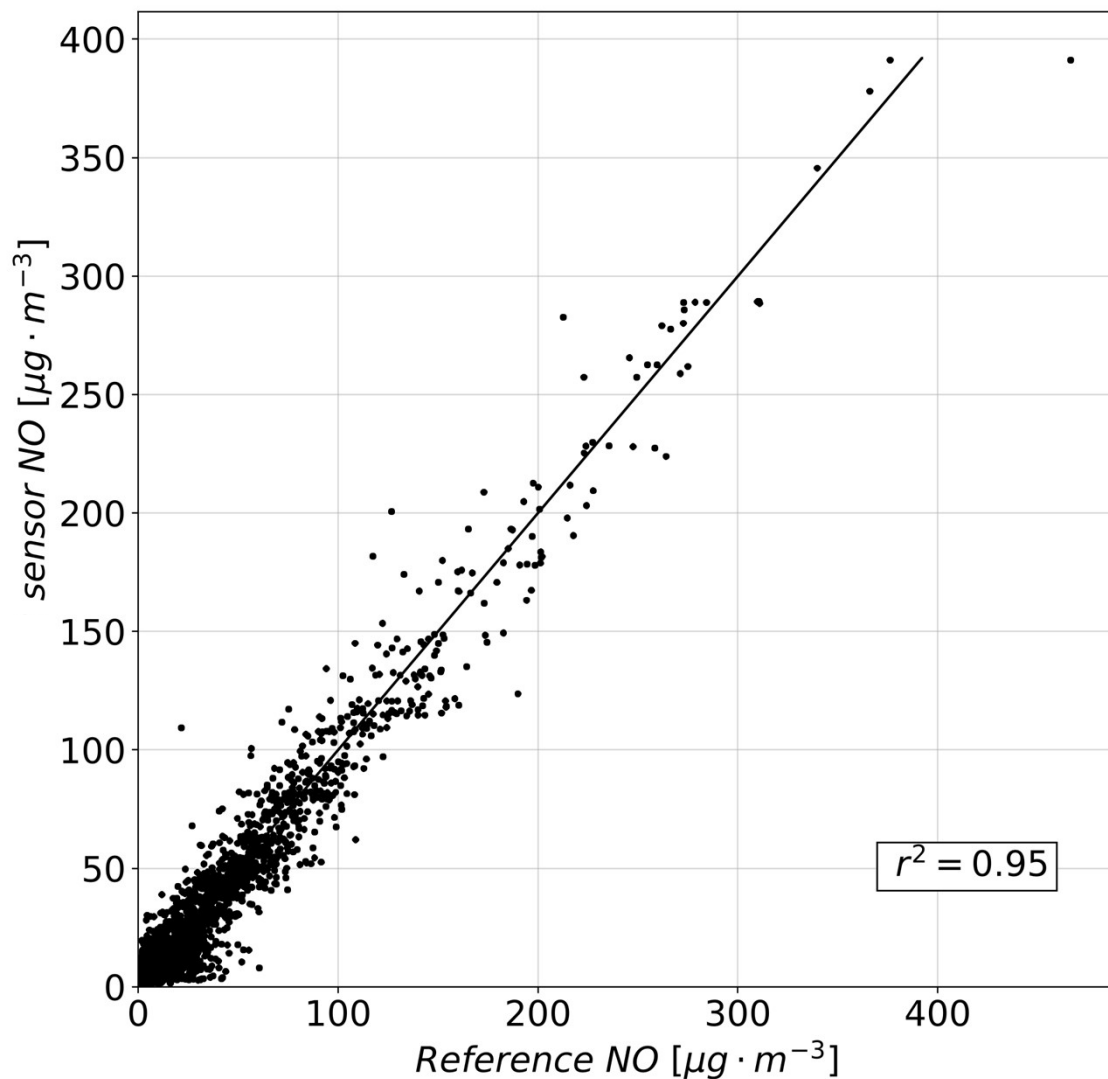

*Figure S1 - Scatterplots of reference versus Low-cost sensors calibrated concentrations for the three air pollutants Coefficient of determination ( $r^2$ )*

Here in Figure S2, the time series shows the daily mean concentrations from the reference urban background station and the different LCS's that rotated through the same location (PFR) during the measurement period. It shows the low-cost sensor network captures similar temporal variations and effectively differentiates between pollution levels and seasonality trends with the AQM.

## Daily means NO<sub>2</sub> LCS vs. Reference

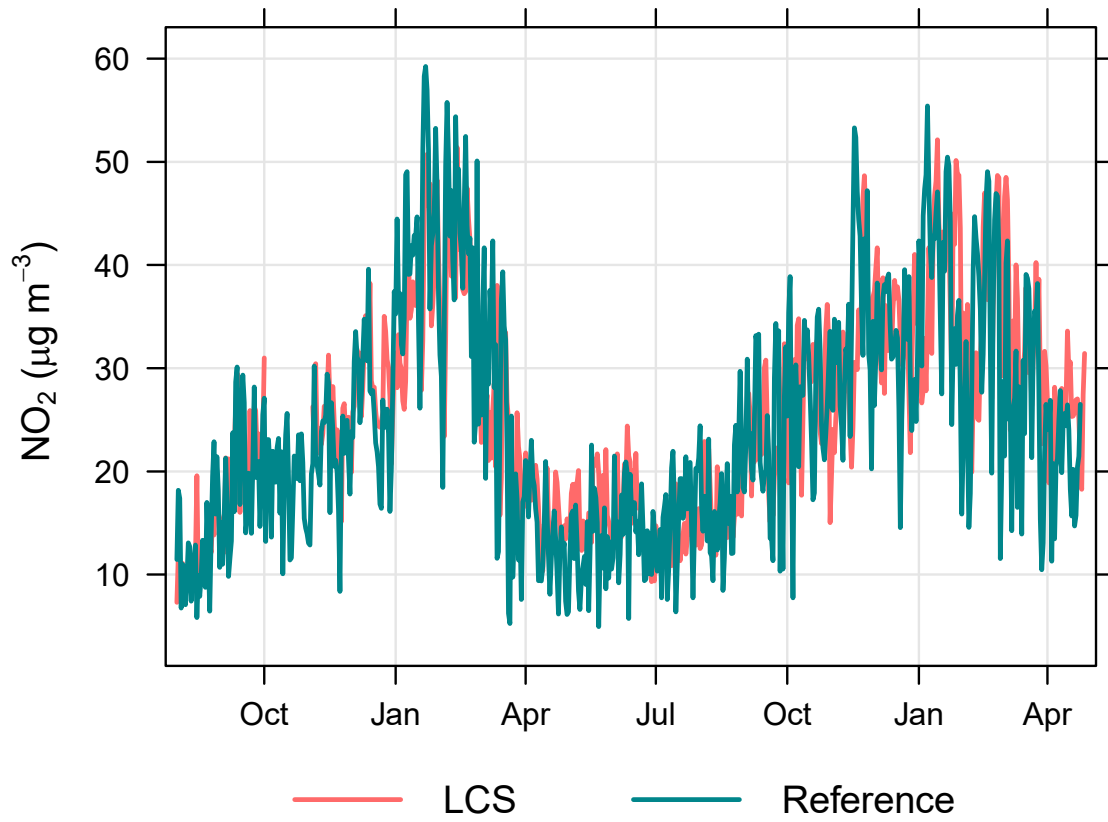

*Fig. S2. Temporal variations of daily mean NO<sub>2</sub> concentrations in Parco Ferrari, Modena as measured by the LCS and the reference (AQM)*
